# Supplementary material for: The Transcription Factor MbWRKY46 in Malus baccata (L.) Borkh Mediate Cold and Drought Stress Responses
Source: MDPI journal article supplement (doi:10.3390/ijms241512468), 2023-08-05
Supplement: s1 [file s1]

**Table S1** List of primers used in this study.

| Primer Name         | PrimerSequence (5'→3')                      | Purpose                             |
|---------------------|---------------------------------------------|-------------------------------------|
| <i>MdWRKY46</i> -F  | ATGGATTCTAGTAAGAGCTGGG                      | full-length cDNA of <i>MdWRKY46</i> |
| <i>MdWRKY46</i> -R  | TTATAAGAAAAATCCTGGGCA                       | full-length cDNA of <i>MdWRKY46</i> |
| <i>MdWRKY46</i> -2F | GAGCTCGGTACCCGGGGATCCATGGATTCTAGTAAGAGCTGGG | subcellular localization            |
| <i>MdWRKY46</i> -2R | GCCCTTGCTCACCATGTCGACTAAGAAAAATCCTGGGCAGTC  | subcellular localization            |
| <i>MdWRKY46</i> -qF | CAAGCCAGATGAGAAACA                          | qPCR                                |
| <i>MdWRKY46</i> -qR | TCAAACGGGAAATAGGAG                          | qPCR                                |
| <i>Actin</i> -F     | ACACGGGGAGGTAGTGACAA                        | qPCR                                |
| <i>Actin</i> -R     | CCTCCAATGGATCCTCGTTA                        | qPCR                                |
| <i>AtKIN1</i> -F    | AGCACAAACAGGCGGGAAG                         | qPCR                                |
| <i>AtKIN1</i> -R    | GTGGTGTTCTCTGTTTGATCCA                      | qPCR                                |
| <i>AtRD29A</i> -F   | GTGCCGACGGGATTTGACG                         | qPCR                                |
| <i>AtRD29A</i> -R   | CCCCAAGAAATCAAACAA                          | qPCR                                |
| <i>AtCOR47A</i> -F  | ACAGAGGAATCACCAGCGACG                       | qPCR                                |
| <i>AtCOR47A</i> -R  | CGTTGTTCTTGTA CTCTCAGCCAT                   | qPCR                                |
| <i>AtDREB2A</i> -F  | TGGAGAATGGTGCGGAAGA                         | qPCR                                |
| <i>AtDREB2A</i> -R  | CTCCACTCTGATCATAAACTGCCAT                   | qPCR                                |
| <i>AtERD10</i> -F   | AACACCGTTCCAGAGCAGG                         | qPCR                                |
| <i>AtERD10</i> -R   | CGGTGTTCTTGTA CTCTTGCCAT                    | qPCR                                |
| <i>AtRD29B</i> -F   | CGGTGTTCTTGTA CTCTTGCCAT                    | qPCR                                |
| <i>AtRD29B</i> -R   | GAAGGAGACGCAACAAGGG                         | qPCR                                |
| <i>MdWRKY46</i> -hF | GAGCTCGGTACCCGGGGATCCATGGATTCTAGTAAGAGCTGGG | homologous recombination            |
| <i>MdWRKY46</i> -hR | TGCCTGCAGGTCGACTCTAGATAAGAAAAATCCTGGGCAGTC  | homologous recombination            |

**Table S2.** The PCR reaction system of *MbWRKY46*

| Component                | Volume  |
|--------------------------|---------|
| cDNA                     | 1.5 µL  |
| <i>MbWRKY46</i> -F       | 1.0 µL  |
| <i>MbWRKY46</i> -R       | 1.0 µL  |
| 2×Easy Taq® PCR SuperMix | 12.5 µL |
| dd H <sub>2</sub> O      | 9.0 µL  |
| Total Volume             | 25 µL   |

**Table S3.** PCR reaction conditions

| Step             | Temperature | Time  |
|------------------|-------------|-------|
| Pre denaturation | 95 °C       | 5 min |
| Denaturation     | 95 °C       | 45 s  |
| Annealing        | 55 °C       | 1 min |
| Extend           | 72°C        | 5 min |
